# Supplementary material for: Structural and functional analysis of the roles of the HCV 5′ NCR miR122-dependent long-range association and SLVI in genome translation and replication
Source: PeerJ. 2018 Nov 6;6:e5870. doi: 10.7717/peerj.5870 (PMC6225842; doi:10.7717/peerj.5870)
Supplement: Supplemental Information 3 [file peerj-06-5870-s003.xlsx]

## Sheet: 5' SLVI
Sequence	WT					Avg	SD	A Site							Avg	SD	A + LH							Avg	SD	A + RH							Avg	SD	A + LH/RH							Avg	SD	LH
	1a	1b	2a	2b	2c			1a	1b	1c	2a	2b	3a	3b			1a	1b	1c	2a	2b	3a	3b			1a	1b	1c	2a	2b	3a	3b			1a	1b	1c	2a	2b	3a	3b			1a	1b	1c	2a	2b	2c
T	2.35201	2.2644	1.23767	1.85662	2.03875	1.94989	0.442853			1.77124	1.39149	1.73514	1.22808	1.48466	1.52212	0.230416			1.601	1.46619	1.08684	1.13372	1.66775	1.3911	0.266949			2.21559	2.03272	1.08332	1.50198	2.3911	1.84494	0.540514			2.32377	2.44656	1.11962	1.3852	2.71775	1.99858	0.702219						1.06507
T	1.47882	1.44955	0.893094	1.57582	1.4049	1.36044	0.268669			1.25955	1.05107	1.50367	0.987639	1.16657	1.1937	0.20246			0.931773	0.889759	0.731016	0.919393	1.33578	0.961544	0.224172			1.67314	1.68418	0.493483	1.26245	1.35175	1.293	0.485061			1.66829	1.82647	0.930284	1.31229	1.80036	1.50754	0.38231						0.855252
A	0.975052	1.04705	1.18545	1.41846	1.21403	1.16801	0.171033			1.14244	0.94942	1.20904	0.833919	0.980174	1.023	0.151557			0.584316	0.514727	1.03811	1.14661	1.05898	0.868548	0.29509			1.36845	1.41339	0.802881	1.33504	1.21612	1.22718	0.248202			1.44626	1.52419	1.02388	1.35922	1.508	1.37231	0.20526						0.923096
A	1.06151	1.02999	1.32214	1.18264	1.13132	1.14552	0.1153			0.990384	0.825582	1.03988	0.787461	0.904011	0.909464	0.106663			0.633726	0.586123	1.1839	1.26291	1.01455	0.936242	0.31156			1.21798	1.24899	1.17929	1.42602	1.20614	1.25568	0.0984524			1.26415	1.34868	1.15562	1.37555	1.42057	1.31291	0.104775						1.08301
G	0.357873	0.325513	0.842354	0.642828	0.592699	0.552254	0.214005			0.563142	0.485943	0.52037	0.467107	0.465545	0.500421	0.0414355			0.175908	0.107636	1.14122	0.583359	0.455319	0.492688	0.411954			0.669831	0.680954	1.16334	0.632496	0.492369	0.727798	0.254833			0.587104	0.661009	1.09888	0.684667	0.698992	0.746131	0.201847						0.884419
T	0.387773	0.368183	0.886655	0.669039	0.634995	0.589329	0.215854			0.556127	0.491208	0.515444	0.44474	0.491118	0.499727	0.0406148			0.240916	0.211318	1.04993	0.60733	0.450933	0.512085	0.341351			0.647862	0.614661	1.14443	0.592348	0.516437	0.703147	0.251371			0.589688	0.636254	1.11849	0.690484	0.751699	0.757322	0.210771						0.923257
T	0.263741	0.193932	0.4691	0.40853	0.385233	0.344107	0.112334			0.337526	0.28523	0.310383	0.293262	0.31859	0.308998	0.0394516			0.16024	0.147582	0.51933	0.341669	0.285271	0.290818	0.137692			0.39864	0.352374	0.558943	0.314135	0.305129	0.385844	0.100133			0.340883	0.388619	0.599827	0.394972	0.452197	0.4353	0.116241						0.460614
C	0.121216	0.107383	0.238242	0.238732	0.210215	0.183157	0.0640962		0.223709	0.188855	0.170773	0.219294	0.219506	0.221287	0.207237	0.0274068		0.237212	0.102837	0.121375	0.271775	0.211743	0.174025	0.186495	0.0652865		0.29271	0.224654	0.229723	0.233709	0.185126	0.144658	0.21843	0.0462022		0.253689	0.206988	0.235508	0.32171	0.236972	0.251836	0.251117	0.0388257	0.243478	0.0999546				0.257279
C	0.0390842	0.0493154	0.240273	0.236939	0.214246	0.155971	0.102587		0.248428	0.168657	0.176378	0.223358	0.221486	0.222098	0.210068	0.0638478		0.231357	0.0271513	0.0545316	0.266896	0.188273	0.16555	0.155626	0.12093		0.279671	0.213102	0.213862	0.194927	0.132798	0.109473	0.190639	0.0900215		0.264612	0.199809	0.215482	0.312635	0.227208	0.253875	0.245604	0.103256	0.246294	0.130738				0.227805
C	-0.0417168	0.00574592	0.345689	0.315317	0.290928	0.183193	0.185432		0.346793	0.224375	0.229619	0.265703	0.256532	0.244159	0.261197	0.04726		0.342459	-0.0325006	-0.0378881	0.392366	0.250416	0.21722	0.188679	0.169035		0.366044	0.253944	0.260179	0.330265	0.237109	0.186978	0.27242	0.10075		0.475409	0.233852	0.242166	0.459508	0.326738	0.358023	0.349283	0.0929794	0.259335	0.239932				0.308436
G	-0.271244	-0.243344	0.167287	0.224068	0.185552	0.0124638	0.247302		0.134821	0.131843	0.155943	0.143523	0.174451	0.129778	0.14506	0.0333679		0.196289	-0.282983	-0.29183	0.11615	0.0634379	0.0814145	-0.0195871	0.204134		0.0342728	0.133325	0.12611	0.041117	0.0870521	0.0224304	0.0740512	0.065968		0.220859	0.100209	0.0898134	0.250284	0.206326	0.250995	0.186414	0.0709573	0.0518983	-0.0215259				0.0826624
G	-0.412614	-0.393629	0.140847	0.196706	0.168398	-0.0600586	0.313866		0.0761556	0.0419854	0.13053	0.111164	0.143885	0.116873	0.103432	0.038212		0.152627	-0.335247	-0.368254	0.0954856	0.0267471	0.0395867	-0.0648425	0.223632		-0.0376599	0.0651682	0.103556	0.00317865	0.0268875	-0.0294212	0.0219516	0.0466539		0.17783	0.0351319	0.0343835	0.230686	0.182386	0.196743	0.14286	0.0841521	-0.0407641	-0.0844541				0.0391748
G	-0.214744	-0.246883	0.107052	0.166771	0.117423	-0.014076	0.19946		0.0731774	0.0694234	0.0889394	0.0858645	0.104335	0.0902278	0.0853279	0.159971		0.134986	-0.103983	-0.104169	0.0964203	0.0660389	0.0620939	0.0252312	0.130108		0.0416736	0.0844507	0.123062	0.0832966	0.0785956	0.0430412	0.0756865	0.0395726		0.146865	0.0590963	0.102033	0.15755	0.11245	0.136127	0.11902	0.25877	-0.0314358	-0.113401				0.0330931
C	0.0972504	0.322266	0.305007	0.305908	0.208191	0.247725	0.0954311	-0.390151	0.478651	-0.227339	0.194152	0.270526	0.0612277	0.175698	0.080395	0.24137	0.302463	0.236989	0.157399	0.136483	-0.00285778	0.137088	0.160872	0.161205	0.0895217	0.119882	0.156851	-0.146831	-0.0744704	0.218585	0.154957	0.0613511	0.0700463	0.166311	0.434083	-0.515133	0.0712363	0.160285	0.0411942	0.067674	0.0416692	0.0430011	0.148938	0.0211844	0.0785875				0.279123
G	-0.345593	-0.0408666	0.207041	0.222032	0.214711	0.0514648	0.248056	0.0823897	0.0535246	-0.230257	0.226601	-0.0766347	0.0696241	0.117966	0.0347449	0.150341	0.0536678	0.182115	-0.000997898	0.0659783	0.0699653	0.103348	0.156062	0.0900197	0.0727974	0.209612	-0.224957	-0.135421	-0.0546089	0.266312	0.00656705	0.060447	0.0182788	0.141278	0.295755	-0.00440793	0.0619691	0.0704737	0.121059	0.100064	0.100954	0.106552	0.0818313	0.102499	0.102527				0.214275
G	-0.314894	-0.162756	-0.205951	0.094316	0.175138	-0.0828293	0.208164	0.0146441	0.11402	-0.0512585	0.245026	-0.128128	0.0887901	-0.00921733	0.0391253	0.118466	0.114131	0.219928	0.224925	0.162416	0.127877	0.158658	0.365866	0.196257	0.50954	0.0447376	0.0315689	-0.0135694	0.0502045	0.288819	0.106658	0.122013	0.0900617	0.131473	0.153099	0.06729	0.0275525	0.193647	-0.0318223	0.0916227	-0.0333652	0.0668605	0.187579	0.101607	-0.0134232				0.0829714
C	-5.63713	-5.22159	0.347905	0.312388	-0.327297	-2.10514	3.04999	0.0697952	0.0640412	0.277688	0.503231	0.85836	1.44388	0.303493	0.502927	0.57663	0.685311	1.52148	0.571032	-1.66411	0.0526006	0.0903171	-0.0436398	0.173284	0.892446	0.153014	-0.139523	0.557088	0.255562	-0.782529	0.302658	0.619449	0.13796	0.549293	0.471041	0.506417	-0.204394	0.611824	0.211708	0.59739	0.455434	0.378488	0.288238	0.819651	1.11788	0.636238	1.4524	1.70571	0.2854
G	-5.8971	-5.69613	0.352449	0.310568	-0.28682	-2.24341	3.25424	0.914388	-0.351377	1.14131	1.64808	0.85836	1.48646	0.964586	0.951686	0.301253	0.685311	1.14005	0.565285	-1.75053	0.0526006	0.0903171	-0.0152522	0.109683	0.809468	0.153014	0.968461	0.676386	0.84687	-0.85603	-0.315331	0.714621	0.31257	0.680235	0.471041	0.497162	-0.0967207	0.556596	0.211708	0.59739	0.325229	0.366058	0.254924	0.436228	0.33343	0.931109	0.300579	0.791699	0.2854
G	-5.91509	-5.83259	0.352449	0.310568	-0.283896	-2.27371	3.29621	1.06316	1.05899	0.797486	1.74294	0.85836	1.48872	3.3554	1.48072	0.982697	0.685311	0.261694	0.571598	-1.12662	0.0584524	0.0903171	0.0281943	0.0812783	0.593103	0.153014	0.954071	0.676386	0.917374	-0.85603	-0.335906	0.703082	0.315999	0.635479	0.471041	0.0972241	-0.122494	0.395098	0.212662	0.59739	0.415373	0.295185	0.231497	0.477309	0.442766	0.435042	0.320117	0.914405	0.285295
C	0.00319868	0.301069	0.307283	0.542861	0.289286	0.28874	0.191447	0.229033	0.361856	-0.00366609	0.254436	0.00849364	0.304081	0.225115	0.19705	0.273636	0.38574	0.288699	0.0362635	0.0727383	0.199423	-0.398396	0.0409298	0.0893425	0.294471	0.244357	0.37802	0.326841	0.446226	-0.560212	-1.15159	-0.0578103	-0.0534532	0.651046	0.350003	0.315893	0.171495	0.355816	0.304014	0.270908	0.240441	0.286939	0.20177	0.282781	0.155384	0.171832	0.32254	0.339586	0.323811
C	0.38774	0.398416	-0.00541138	-0.0260815	-0.176529	0.115627	0.261774	0.677045	0.818902	0.605738	0.564347	0.587385	0.435343	0.553675	0.606062	0.307694	0.644178	0.518943	0.386858	0.409052	0.0526006	0.0899984	-0.296253	0.257911	0.433575	0.814555	0.730907	0.821617	0.796205	-0.85603	-0.564498	-1.36635	0.0537719	1.05688	0.831058	0.78833	0.492165	0.553094	0.210684	0.23258	-0.173319	0.419227	0.547129	0.530028	0.422469	0.515743	0.469539	0.503654	0.875679
A	1.13526	1.03625	1.17433	0.837791	0.85945	1.00861	0.154672	1.1669	1.3618	0.966312	0.787651	0.88904	0.610025	0.789301	0.938719	0.187031	1.21325	1.03214	1.01722	1.10347	0.74817	0.90242	0.790654	0.972473	0.165851	1.32164	1.4029	0.934465	0.901554	-0.378006	0.782506	0.355387	0.760064	0.541324	1.58099	1.53921	0.953544	0.931694	1.00119	1.0172	0.891177	1.13072	0.242769	1.31474	1.1549	1.31673	1.17787	1.20952	1.13117
G	0.709676	0.655166	0.775368	0.574202	0.565807	0.656044	0.0893812	0.647423	0.677319	0.648896	0.515178	0.486944	0.462134	0.443378	0.554467	0.324695	0.913269	0.978582	0.976574	1.04674	1.2362	1.21603	0.883659	1.03587	0.300467	0.65138	0.698639	0.593212	0.578572	0.916916	0.456307	0.439499	0.619218	0.282328	0.881252	0.907425	0.692813	0.693776	1.09749	0.738194	0.682003	0.813279	0.291521	1.26736	1.15642	1.18597	1.11141	1.10282	1.23437
A	0.612542	0.571315	0.493316	0.697022	0.591129	0.593065	0.0735068	1.09649	1.36404	0.876123	0.78115	0.673571	0.392449	0.574383	0.822601	0.224926	1.55857	1.75189	1.49171	1.61615	0.998712	1.0589	1.48309	1.42272	0.347139	0.958793	1.22503	0.765336	0.76056	0.365228	0.537865	0.471386	0.726315	0.229849	1.44592	1.45843	0.773543	0.785866	1.06553	0.856362	0.710076	1.01368	0.253141	2.45759	1.94433	1.93193	1.70198	1.76745	1.07644
T	-0.0557801	0.1588	0.500137	0.454663	0.405295	0.292623	0.235216	0.570151	0.664418	0.481394	0.441043	0.373526	0.364744	0.408438	0.471959	0.0834311	0.716847	0.715591	0.244276	0.254414	0.988078	0.72639	0.506902	0.593214	0.274352	0.524247	0.355774	0.384411	0.394796	0.590284	0.168969	0.163954	0.368919	0.169511	0.831787	0.89846	0.39956	0.486038	0.927639	0.57002	0.481848	0.656479	0.194781	0.907479	0.820938	0.950459	0.781474	0.816385	0.962208
C	-0.338382	-0.144489	0.277637	0.320394	0.256328	0.0742977	0.297161	0.563331	0.558363	0.298671	0.41859	0.442884	0.347422	0.455222	0.440641	0.0901667	0.407668	0.415631	0.09182	-0.0213233	0.27877	0.0419258	0.0899762	0.186352	0.267241	0.308616	0.232776	0.240489	0.258596	-0.383385	-0.296769	-0.324953	0.00505292	0.328352	0.587021	0.604952	0.287987	0.321424	0.407372	0.525984	0.33776	0.438929	0.203921	0.418044	0.345136	0.210118	0.287265	0.403093	0.67531
G	-0.0942545	0.000508946	0.460969	0.440209	0.422174	0.245921	0.269724	0.447581	0.508023	0.347627	0.390159	0.286857	0.263534	0.345429	0.369887	0.0619377	0.712236	0.737309	0.348501	0.284278	0.999299	0.790978	0.535514	0.629731	0.253247	0.300281	0.296113	0.253542	0.274328	0.34737	0.150072	0.0786248	0.242904	0.111548	0.820269	0.865378	0.401099	0.460915	0.858686	0.744958	0.512671	0.666282	0.185854	0.620526	0.416861	0.693107	0.593487	0.654692	0.911472
T	0.0540453	0.071017	0.324231	0.331239	0.321729	0.220452	0.144329	0.383556	0.323904	0.327124	0.311148	0.22434	0.208075	0.238823	0.288139	0.0811183	0.515606	0.503566	0.307668	0.251103	0.790064	0.512429	0.374626	0.465009	0.177447	0.438364	0.402127	0.438097	0.437087	0.731746	0.496571	0.341388	0.46934	0.430412	0.489646	0.520633	0.305172	0.332811	0.535418	0.563495	0.363035	0.444316	0.105334	0.77042	0.687484	0.746516	0.688099	0.686068	0.985794
T	-0.0614513	0.0339085	0.297184	0.351678	0.314311	0.187126	0.187505	0.453491	0.417207	0.412293	0.406833	0.20649	0.303548	0.309875	0.358534	0.155868	0.432712	0.453396	0.147733	0.0733274	0.811043	0.468776	0.348404	0.39077	0.240363	1.18543	1.57319	1.12888	1.01869	0.849732	1.31518	1.32083	1.19885	0.178139	0.565706	0.504725	0.313492	0.35077	0.724077	0.6114	0.411515	0.497383	0.158207	0.824048	0.636316	0.803336	0.712112	0.771555	0.946277
G	0.252126	0.270732	0.49259	0.489222	0.419434	0.384821	0.116551	0.795529	0.696405	0.656845	0.515222	0.490296	0.463074	0.524135	0.591644	0.705308	0.335531	0.342984	0.125651	0.12945	0.440596	0.268386	0.237483	0.268583	0.113388	1.15578	0.962525	0.713164	0.692286	1.09312	0.804821	0.898777	0.902925	0.179948	0.65143	0.642844	0.462307	0.485068	0.974801	0.657808	0.539482	0.630534	0.249265	0.636085	0.589369	0.637804	0.599963	0.609687	0.790904
G	1.16897	1.08037	1.38677	1.00997	1.15597	1.16041	0.141748	2.46062	2.4147	1.7923	1.28243	1.84438	1.00649	1.59266	1.77051	0.715156	0.339508	0.317648	0.0826697	0.0586454	0.380763	0.224042	0.20041	0.229098	0.119363	0.741031	0.81855	0.629576	0.553609	1.16072	0.661664	0.858138	0.774755	0.311455	1.11515	1.10591	0.799529	0.781014	1.24124	0.954925	0.917813	0.98794	0.305797	0.533248	0.580486	0.512341	0.446412	0.497699	0.756386
C	0.0338288	0.0297075	0.15071	0.242665	0.158397	0.123061	0.0908231	0.234353	0.213165	0.251502	0.250851	0.185574	0.174344	0.226904	0.219528	0.0872371	0.186347	0.197082	-0.0713417	-0.00975066	0.197742	0.153949	0.116611	0.110091	0.104184	0.128944	0.135317	0.166398	0.151631	0.0331528	0.0190641	0.0339743	0.0954973	0.0613153	0.336407	0.286242	0.217255	0.227395	0.460996	0.416823	0.27757	0.317527	0.120872	0.28541	0.248633	0.258169	0.210914	0.250203	0.368542
G	-0.336779	-0.17268	0.0899816	0.215877	0.138363	-0.0130477	0.232503	0.151407	0.0040333	0.144798	0.217441	0.00169058	0.110844	0.1184	0.106945	0.0691143	0.113823	0.160788	0.0670848	0.460849	0.207518	0.288658	0.105958	0.200668	0.166162	0.0222863	0.0924518	0.0936531	0.102458	-0.0562412	-0.0454844	-0.0204525	0.0269531	0.0738757	0.301522	0.114277	0.130277	0.267441	0.344583	0.313514	0.258371	0.247141	0.0686962	0.0948119	0.132413	0.0927143	0.0760464	0.0887012	0.151019
G	-0.46786	-0.296947	0.418128	0.427999	0.366457	0.0895552	0.435682	0.145947	0.188739	0.227347	0.238029	0.00624001	0.113998	0.117997	0.148328	0.0880778	0.685311	0.463109	0.565285	-1.10388	0.0526006	0.0857684	0.341791	0.155712	0.587257	0.117501	0.117782	0.147846	0.139059	0.0514457	0.0125166	0.0161859	0.0860481	0.128698	0.471041	0.253855	-0.17698	0.24114	0.211708	0.50808	0.358648	0.266784	0.392654	0.101753	-0.0452417	0.0823235	0.0541153	0.103872	0.14549
A	-4.48103	-0.493383	0.454526	0.803322	0.641045	-0.615105	2.21891	0.241384	0.250866	0.202872	0.272596	0.119383	0.13723	0.200806	0.203591	0.0549563	0.685311	0.0991709	0.565285	-1.50152	0.0526006	0.0889183	0.329939	0.0456728	0.734617	0.436536	0.387111	0.343132	0.283113	0.361832	0.14921	0.172181	0.304731	0.108125	0.471041	-0.578865	0.163756	0.334245	0.211708	0.548569	0.453569	0.229146	0.225649	0.180649	0.107717	0.183584	0.16793	0.182573	0.303562
G	-5.85519	-5.94015	0.352449	1.05114	1.08006	-1.86234	3.69536	0.209038	0.226273	-0.00117345	0.163496	0.0840727	0.173816	0.161005	0.145218	0.0820234	0.683576	0.347561	-1.34517	-4.21815	0.0526006	0.0893956	0.188214	-0.600282	1.73436	0.30214	0.200982	0.265935	0.231246	0.216707	0.0730119	0.0877618	0.196826	0.105534	0.0790081	-0.104247	0.340835	0.0986813	0.211708	0.495717	0.419804	0.220215	0.157444	0.356129	0.261586	0.359238	0.28886	0.337223	0.665232
T	0.434676	0.0968143	0.515023	0.451268	0.396287	0.378814	0.163365	0.227148	0.244055	0.27641	0.217937	0.171595	0.203705	0.194226	0.219297	0.190866	0.512821	0.511538	0.334827	-0.154688	0.996726	0.864196	0.421529	0.498136	0.448738	0.392404	0.356905	0.345543	0.31071	0.0638887	0.0563148	-0.0107278	0.216434	0.229443	0.315884	0.311857	0.214106	0.213758	0.415512	0.314835	0.223624	0.287082	0.280954	0.638239	0.611085	0.656557	0.59941	0.590686	0.8128
A	0.827203	0.995733	0.895178	0.649392	0.788993	0.8313	0.128468	0.643405	0.71274	0.630663	0.507529	0.415866	0.331557	0.42096	0.523246	0.229663	1.43751	1.14998	1.24442	1.10345	0.851476	1.0779	1.13024	1.14214	0.178582	0.786543	0.627924	0.594297	0.507298	0.962251	0.403443	0.363342	0.606442	0.321858	0.900254	1.00015	0.732393	0.663324	0.973264	0.681182	0.674881	0.803635	0.26232	1.05069	1.02264	0.979536	0.859358	0.904152	1.14431
T	1.15921	1.30634	1.00737	0.706148	0.918627	1.01954	0.229296	1.14034	1.01804	0.900561	0.717351	0.751656	0.462299	0.728199	0.816922	0.242975	1.17348	1.07784	1.32245	1.30306	0.924973	1.08287	0.960452	1.12073	0.206079	1.37395	1.24398	0.850236	0.764592	1.01842	0.485551	0.662965	0.914241	0.343234	1.2846	1.38652	1.03651	0.909572	0.972704	0.738754	0.762439	1.01301	0.217896	1.17447	1.10458	1.13449	1.01072	0.987661	1.22854
A	0.318923	0.417025	0.47469	0.325087	0.417901	0.390725	0.066978	0.419777	0.439178	0.391941	0.347028	0.283502	0.233004	0.303942	0.345482	0.0755841	0.77151	0.764855	0.939347	0.943285	1.21291	0.766219	0.672344	0.86721	0.264467	0.409542	0.341961	0.321071	0.273329	0.397791	0.083127	0.218703	0.292218	0.133846	0.587203	0.638679	0.497169	0.414502	0.667353	0.378651	0.421377	0.51499	0.138515	0.636842	0.565336	0.639745	0.576556	0.556631	0.678981
C	-0.081814	0.0656564	0.312149	0.301618	0.204246	0.160371	0.167732	0.429893	0.222709	0.315599	0.272739	0.0846162	0.169453	0.339199	0.26203	0.121487	0.350618	0.362254	0.36153	0.143283	0.435395	0.252277	0.189914	0.299324	0.10426	0.184263	0.0886726	0.0298906	-0.0033445	-0.268582	-0.166633	-0.163948	-0.0428115	0.157282	0.220718	0.249322	0.1815	0.129892	0.168069	0.188938	0.136243	0.182097	0.0451317	0.317385	0.120025	0.27637	0.168193	0.189622	0.415802
T	-0.441405	-0.260129	0.126449	0.221381	0.18971	-0.0327988	0.299214	0.0907842	0.152008	0.148754	0.208856	0.0859481	0.144629	0.154623	0.1408	0.0544094	0.33825	0.340999	0.196967	-0.00539566	0.444436	0.24226	0.215833	0.253336	0.138308	0.10167	0.0532208	0.0831761	0.0518985	-0.0381228	-0.0527903	-0.0154426	0.02623	0.0600584	0.144947	0.257377	0.154708	0.114423	0.231508	0.209016	0.166108	0.182584	0.0396745	0.0859238	-0.0550226	0.114573	0.0547193	0.0825982	0.192209
T	-0.483302	-0.304632	0.104482	0.209865	0.164276	-0.0618625	0.311927	0.165283	0.231674	0.123015	0.224996	0.0572585	0.139339	0.173105	0.159239	0.0595441	0.265401	0.266854	0.130224	-0.0908147	0.39453	0.166718	0.19727	0.190026	0.14695	0.0848783	0.0292495	0.0645939	0.0535476	-0.0195186	-0.0331877	0.00410973	0.026239	0.0444091	0.230937	0.184351	0.164762	0.0781775	0.200854	0.19356	0.14729	0.171419	0.0486351	0.10268	-0.0482798	0.109676	0.0262948	0.0970095	0.214285
G	-0.302995	-0.213743	0.123751	0.16669	0.16678	-0.0119036	0.22787	0.161731	0.227172	0.1118	0.176175	0.0934118	0.139537	0.144636	0.150637	0.0300714	0.152505	0.175595	0.0264837	-0.15983	0.215903	0.108972	0.129051	0.0926684	0.123043	0.109127	0.0343858	0.130096	0.0790114	0.0237231	0.00422968	0.0253554	0.0579899	0.0470759	0.173406	0.170071	0.107301	0.0758422	0.198355	0.194256	0.160352	0.154226	0.0463765	0.0873872	-0.0488301	0.118263	0.0511099	0.106196	0.176134
T	-0.16266	-0.110214	0.148741	0.125954	0.158952	0.0321545	0.155475	0.13549	0.166139	0.179647	0.173799	0.105818	0.152548	0.132869	0.149473	0.0355996	0.155873	0.142667	0.0525081	-0.0528523	0.159546	0.125228	0.119949	0.100417	0.0899634	0.107746	0.0640838	0.133445	0.112955	0.0514774	0.0473782	0.0489414	0.0808611	0.0354634	0.147609	0.179024	0.112385	0.0811925	0.194462	0.200686	0.156705	0.153152	0.04281	0.0832323	0.0155991	0.130394	0.0976259	0.0996839	0.160873
T	-0.263574	-0.161849	0.201819	0.209778	0.242107	0.0456562	0.239059	0.194095	0.212941	0.209763	0.229538	0.143091	0.161309	0.225186	0.19656	0.0418976	0.2264	0.227861	0.146963	-0.0387094	0.315024	0.171353	0.154147	0.171863	0.107962	0.123003	0.0927918	0.1478	0.111807	0.100265	0.0231576	0.0665138	0.0950483	0.047045	0.208725	0.166197	0.174064	0.130296	0.255221	0.232751	0.178059	0.192188	0.0480924	0.159628	0.169178	0.228443	0.146237	0.153898	0.25642
G	0.0913329	0.134956	0.264797	0.223654	0.243834	0.191715	0.0747924	0.253086	0.265381	0.24643	0.242212	0.190174	0.206555	0.223333	0.232453	0.101621	0.207628	0.207232	0.203684	0.107182	0.266255	0.163764	0.184541	0.191469	0.0726323	0.210149	0.158641	0.22163	0.180537	0.197385	0.0999702	0.154521	0.17469	0.125162	0.25504	0.262568	0.239278	0.202562	0.30376	0.261286	0.22693	0.250203	0.107515	0.23954	0.212607	0.248155	0.197405	0.192816	0.258204
C	0.390228	0.416666	0.442112	0.246966	0.376822	0.374559	0.0756093	0.455026	0.489069	0.437991	0.382549	0.391418	0.284129	0.391424	0.404515	0.199162	0.328781	0.332831	0.435521	0.387393	0.426568	0.231485	0.238833	0.340202	0.112747	0.487825	0.490481	0.414288	0.332971	0.364335	0.0987071	0.236314	0.346417	0.169176	0.491055	0.520191	0.523614	0.408969	0.574433	0.371618	0.370187	0.465724	0.112448	0.444071	0.426271	0.469644	0.411306	0.382722	0.45386
C	0.204454	0.44358	0.543922	0.311122	0.403318	0.381279	0.12943	0.693011	0.89727	0.721641	0.762449	0.349298	0.27369	0.480426	0.596826	0.190498	0.541268	0.544319	0.756399	0.488097	0.845808	0.443283	0.406001	0.575025	0.175622	0.844235	0.621341	0.373456	0.271355	0.747326	0.126495	0.341541	0.475107	0.278577	0.726276	0.670901	0.647166	0.507148	0.821576	0.473182	0.479571	0.617974	0.175353	0.48226	0.503544	0.64161	0.508226	0.45644	0.597632
G	-0.22078	-0.205769	0.098825	0.156238	0.1577	-0.00275723	0.193709	0.329006	0.585455	0.48618	0.450202	0.0791349	0.11103	0.161983	0.314713	0.307138	0.30567	0.411512	0.531626	0.354802	0.808679	0.388735	0.407436	0.458352	0.188717	0.262903	0.169866	0.147374	0.0657003	0.107068	-0.0450231	0.0420079	0.107128	0.0953825	0.272713	0.306484	0.300456	0.205334	0.32912	0.259821	0.223501	0.271061	0.0531679	0.204645	0.0567335	0.146869	0.108574	0.109386	0.173233
C	-0.491908	-0.285769	-0.400353	0.0145191	-0.103256	-0.253353	0.208478	0.617404	0.961159	0.672842	0.70884	-0.141338	0.0560248	0.0648258	0.419966	0.418909	0.161122	0.23836	0.233308	0.0625353	0.240962	0.164886	0.172026	0.181886	0.0637514	0.316964	0.079581	0.0731828	-0.0269198	-0.00403186	-0.119962	0.00970128	0.0469308	0.136604	0.146872	0.179944	0.171726	0.0946834	0.174211	0.158047	0.137003	0.151784	0.0295408	0.0868944	0.0181616	0.0558046	0.0464086	0.0645198	0.125867
G	-0.145697	-0.091051		0.0694373	0.0534685	-0.0284606	0.106393	0.222366		0.300675	0.276548	0.0617356	0.129632	0.131679	0.187106	0.0940576	0.171532		0.3407	0.236506	0.225349	0.157582	0.154873	0.214424	0.0709502	0.157171		0.134265	0.0906605	-0.0340754	-0.0739138	-0.020563	0.0422575	0.0972444	0.14059		0.182235	0.102507	0.148725	0.142995	0.124821	0.140312	0.0264755	0.133634	-0.00601965	0.116596	0.0806081	0.0987402	0.128439
[truncated: 24 more columns]

## Sheet: 3'SLVI
Sequence	WT					Avg	SD	A Site							Avg	SD	A + LH							Avg	SD	A + RH							Avg	SD	A + LH/RH							Avg	SD	LH
	1a	1b	2a	2b	2c			1a	1b	1c	2a	2b	3a	3b			1a	1b	1c	2a	2b	3a	3b			1a	1b	1c	2a	2b	3a	3b			1a	1b	1c	2a	2b	3a	3b			1a	1b	1c	2a	2b	2c
G								1.28374							1.28374	#DIV/0!	0.0728749							0.0728749	#DIV/0!	0.391948							0.391948	#DIV/0!	0.263435							0.263435	#DIV/0!
C								0.185868							0.185868	#DIV/0!	-0.43587							-0.43587	#DIV/0!	0.0153057							0.0153057	#DIV/0!	-0.968413							-0.968413	#DIV/0!
C								0.0570843							0.0570843	#DIV/0!	-0.1066							-0.1066	#DIV/0!	0.0197016							0.0197016	#DIV/0!	-0.175185							-0.175185	#DIV/0!
C								0.306669							0.306669	#DIV/0!	0.0785622							0.0785622	#DIV/0!	0.23571							0.23571	#DIV/0!	-0.141553							-0.141553	#DIV/0!
C			-0.0238572	-0.0858439	-0.0252024	-0.0449678	0.0354061	1.20096				0.581845	0.617059	0.476817	0.719171	0.326672	-0.189178				0.312138	0.208815	0.126489	0.114566	0.216271	1.2684				0.453289	0.790604	0.843025	0.838829	0.334422	-0.259492				-0.041684	0.105846	0.188072	-0.00181465	0.196329			0.728679	0.587421	0.777101	0.500736
A			1.08257	1.04618	1.05677	1.06184	0.0187174	1.06724				1.11478	1.03686	1.31969	1.13464	0.127463	0.271437				0.940539	0.824522	0.838234	0.718683	0.302624	1.09916				1.0597	0.950804	1.04516	1.03871	0.0628877	0.481833				1.06875	1.00165	1.11204	0.916066	0.29303			1.81719	2.49619	2.18724	1.08633
G			1.26526	1.30428	1.27056	1.28003	0.0211656	1.07218				1.27426	1.20327	1.47931	1.25725	0.170066	0.683648				1.08895	0.990383	0.982014	0.93625	0.175263	1.19675				1.21311	1.08632	1.1583	1.16362	0.0564215	0.804813				1.2474	1.20792	1.26433	1.13111	0.218815			3.0518	2.71325	3.27294	1.28482
G			1.25295	1.28416	1.28082	1.27265	0.0171348	0.680474				1.30569	1.23338	1.3266	1.13653	0.306651	0.285338				1.13128	1.04583	1.03441	0.874216	0.394958	0.334875				1.27545	1.13123	1.18462	0.981543	0.435203	0.30544				1.3049	1.26757	1.30687	1.0462	0.494168			1.76404	1.50367	1.70979	1.35969
T			1.25896	1.31358	1.28484	1.28579	0.0273222	0.873257				1.3228	1.33632	1.37165	1.22601	0.236066	0.434902				1.15871	1.10135	1.09581	0.947694	0.343042	0.658041				1.26221	1.2131	1.24768	1.09526	0.292206	0.321745				1.36171	1.33638	1.30175	1.0804	0.506365			1.46725	1.40378	1.43577	1.39841
T			1.08688	1.12235	1.08576	1.09833	0.0208129	0.880516				1.16204	1.15018	1.26833	1.11526	0.165269	0.510253				1.06923	1.01798	0.996717	0.898544	0.260644	0.894053				1.10051	1.0095	1.09742	1.02537	0.097182	0.496748				1.24622	1.20986	1.19047	1.03583	0.360127			1.41415	1.39736	1.45365	1.21342
G		0.107635	0.361118	0.409635	0.196341	0.268682	0.140927	0.291971			0.122917	0.369453	0.216945	0.129165	0.22609	0.106085	0.537049			-0.169945	0.569687	0.805143	0.44806	0.437999	0.36457	0.0731987			0.00600097	0.240842	0.347951	0.307316	0.195062	0.148884	0.0509507			0.347051	0.493672	0.591163	0.391309	0.374829	0.204245			0.514487	0.305156	0.500266	0.357441
G	0.270539	-0.195552	0.116536	0.111691	0.0650782	0.0736584	0.169259	0.0949639		-0.0661897	-0.181802	0.0118671	-0.0430361	-0.0772247	-0.0435703	0.0927552	-0.025693		0.146999	-0.44754	0.313616	0.394135	0.26847	0.108331	0.309167	-0.18617		0.171657	-0.41756	0.0588416	0.0139036	0.093235	-0.0443489	0.218646	-0.46062		0.170158	-0.0636382	0.245795	0.259856	0.220075	0.0619375	0.282323			0.158185	0.1021	0.122189	0.126516
G	0.327243	-0.35743	0.102743	0.0681734	0.0163833	0.0314225	0.247679	-0.0621692		0.0571748	-0.0942878	0.0379574	-0.00951166	-0.0497011	-0.0200896	0.0593364	-0.0496666		0.182123	-0.390827	0.420333	0.561624	0.421445	0.190839	0.357654	-0.571153		0.160735	-0.621574	0.1307	0.106168	0.165104	-0.105003	0.38154	-0.344044		0.21927	-0.0258623	0.294017	0.305916	0.26199	0.118548	0.257473			0.218745	0.202631	0.193106	0.160124
T	0.789214	0.468156	0.340117	0.327461	0.296473	0.444284	0.20365	0.658431		0.432304	0.324234	0.164761	0.148138	0.0807776	0.301441	0.217238	0.336961		0.309827	-0.0185962	0.451388	0.535286	0.490125	0.350832	0.200942	0.0205308		0.420463	0.00969927	0.26787	0.329096	0.355882	0.233924	0.176462	-0.548643		0.400591	0.221348	0.365187	0.40155	0.411271	0.208551	0.377694			0.281683	0.28894	0.287063	0.267058
G	2.20148	2.0348	1.03086	1.11285	1.03986	1.48397	0.582774	0.90525		1.88376	1.95777	0.891366	1.07097	0.822359	1.25525	0.522459	0.627004		1.42289	1.1185	1.08733	1.05322	1.04514	1.05901	0.254403	0.603893		1.42442	1.4762	0.804384	1.05985	0.993106	1.06031	0.341721	0.511828		1.34829	1.60172	1.02908	1.22111	1.0475	1.12659	0.368111			0.942598	0.939699	0.945754	0.896361
T	0.841421	0.659495	0.388985	0.374069	0.362651	0.525324	0.215551	0.42753		0.389396	0.393171	0.170092	0.267102	0.179393	0.304447	0.1143	0.778714		0.647437	0.25785	0.596518	0.942256	0.73095	0.658954	0.230087	0.130413		0.498817	0.205813	0.197514	0.285418	0.257666	0.262607	0.127497	-0.016151		0.438978	0.406369	0.473519	0.492461	0.398179	0.365559	0.190569			0.427127	0.378801	0.43124	0.399744
G	0.288243	-0.0190632	0.175937	0.163994	0.118469	0.145516	0.111193	0.0117354		-0.0407212	-0.143862	-0.0265444	-0.0539253	-0.0813974	-0.0557857	0.0530243	0.845365		0.404377	0.00548229	0.496072	0.764421	0.586866	0.517097	0.299564	-0.383564		0.0930164	-0.391145	0.029026	0.0473745	0.0702021	-0.0891818	0.231975	-0.283481		0.179644	-0.0122343	0.249081	0.257916	0.19864	0.0982611	0.211126			0.236643	0.244837	0.250288	0.209749
C	0.0682644	-0.184062	0.0858763	0.0847569	0.0553088	0.0220289	0.115899	-0.0276883	-0.059125	-0.0365287	-0.131691	-0.0152844	-0.0493464	-0.0417846	-0.0516354	0.0380576	0.0940965	0.12336	0.127989	-0.165345	0.234892	0.323171	0.244908	0.140439	0.157757	-0.186114	-0.0236846	0.0267553	-0.347421	0.0475817	0.0313566	0.0577336	-0.056256	0.153321	-0.156783	-0.0724528	0.0841631	-0.0706776	0.132006	0.104694	0.098634	0.0170833	0.114004	0.142309	0.200743	0.133306	0.105676	0.105314	0.113576
G	0.0125581	-0.265381	0.0134928	0.011654	-0.00852168	-0.0472396	0.122288	-0.0470082	-0.0759082	-0.0236924	-0.0866343	0.00994742	-0.0194264	-0.0133439	-0.0365809	0.0349427	-0.0449648	-0.00375581	0.0524565	-0.240131	0.19249	0.237727	0.177692	0.0530734	0.167269	-0.228401	-0.0257888	0.0496536	-0.233636	0.0647342	0.0335998	0.0680397	-0.0388283	0.134956	-0.052411	-0.0105191	0.0451239	-0.0709113	0.0896194	0.0736452	0.0713565	0.0208434	0.0651	0.0546233	0.115423	0.0721532	0.0709159	0.0219199	0.0803435
C	-0.695244	-1.57185	-0.253954	-0.336606	-0.403688	-0.652269	0.540271	-0.0994769	-0.135067	-0.0877598	-0.117922	0.00182224	-0.00764443	-0.0130836	-0.0655902	0.0575391	-0.456013	-0.256153	-0.0507797	-0.649749	0.27361	0.330942	0.237706	-0.081491	0.385728	-0.425293	-0.0449078	0.0473811	-0.480111	0.0808428	0.0560626	0.0793965	-0.0980898	0.246399	0.253526	-0.0368694	0.075343	-0.143654	-0.0394723	-0.106934	-0.156392	-0.0220646	0.144909	0.0368373	0.205063	0.00512725	-0.00695923	-0.012977	0.0623246
G	0.0519615	-0.166889	0.076485	0.0386206	0.0229486	0.00462528	0.0978688	0.0462835	0.0409652	0.060306	0.0143918	0.0632104	0.0546071	0.054689	0.047779	0.0165972	0.0249079	0.0710286	0.0561051	-0.104151	0.173061	0.213133	0.172328	0.0866304	0.109696	-0.101728	0.0779465	0.0843075	-0.199955	0.0896186	0.074453	0.108386	0.019004	0.119936	0.0859297	0.0987456	0.138611	-0.00833426	0.0829534	0.0649536	0.0868872	0.0785353	0.0445203	0.0915951	0.142966	0.129005	0.105147	0.100462	0.0938737
C	-0.00471815	-0.376285	0.067351	0.0426619	0.0276353	-0.0486709	0.184992	0.00566702	-0.0348178	-0.166515	-0.227482	0.0509809	0.0310772	0.0064079	-0.0478117	0.106711	-0.0603685	0.0103323	0.068265	-0.309016	0.195922	0.218903	0.162462	0.0409286	0.184785	-0.186099	0.0162674	0.118355	-0.405757	0.0238778	-0.00862507	0.0194581	-0.0603604	0.177512	-0.124851	0.0158896	-0.0109819	-0.211507	0.130763	0.133348	0.113164	0.00654644	0.134216	-0.0127688	0.107468	0.0931361	0.0903885	0.0681087	0.021767
G	-0.0156883	-0.447258	0.0698535	0.0497186	0.0361999	-0.0614348	0.217989	-0.0396918	-0.130676	-0.136113	-0.212117	-0.0215168	-0.0651569	-0.0566942	-0.0945666	0.0676941	-0.0695952	-0.0123203	-0.000852477	-0.388936	0.156763	0.189598	0.126876	0.000218955	0.197014	-0.242474	0.010417	0.0223397	-0.464873	0.0332494	-0.0298538	0.020064	-0.0930186	0.190324	-0.12686	-0.0640117	0.0794383	-0.11476	0.130333	0.130517	0.105081	0.0199626	0.116865	-0.00670995	0.108043	0.0873391	0.0851662	0.0682339	0.0188813
A	0.0320982	-0.192124	0.0320108	0.0193532	0.00556709	-0.020619	0.0964969	-0.00147389	-0.0436482	-0.0135216	-0.0520695	0.00326718	-0.0270478	-0.00162071	-0.0194449	0.0219831	0.0421946	0.0705179	0.070137	-0.12232	0.12877	0.154979	0.0667815	0.058723	0.0890279	-0.161604	0.0224034	0.0190289	-0.298809	0.0801772	0.0652969	0.0934919	-0.0257164	0.147801	-0.031364	0.0464618	0.112019	-0.00583434	0.0956034	0.0887061	0.0830661	0.0555227	0.0548547	0.0821647	0.133919	0.106939	0.0881111	0.0895957	0.045138
C	-0.0544277	-0.284674	-0.209631	-0.258429	-0.282284	-0.217889	0.0962265	0.0183166	-0.0274703	-0.0282663	-0.0990011	0.049768	0.0372735	0.0367995	-0.00179716	0.0530536	0.101939	0.121448	0.108345	-0.0647714	-0.101044	-0.0942509	-0.380812	-0.0441638	0.178668	-0.0506996	0.0285014	0.0768887	-0.224688	0.085245	0.0748481	0.0949353	0.0121473	0.115922	-0.0410376	0.0309736	0.091926	-0.0409286	0.0386643	0.0129298	0.013178	0.0151008	0.0465627	0.0992565	0.146616	0.114077	0.0735542	0.0810845	0.0761915
A	-0.25482	-0.623548	-0.0218421	-0.0553416	-0.0524516	-0.201601	0.253388	-0.0941814	-0.0783533	-0.149018	-0.237051	0.00580092	0.0146178	-0.0235545	-0.0802485	0.0904916	-0.00334246	0.0979628	0.0490733	-0.250635	0.245099	0.259988	0.210351	0.086928	0.179747	-0.159068	0.0169349	0.0533187	-0.543332	0.0557596	0.0429204	0.0803978	-0.0647241	0.225733	0.0277979	0.0999955	0.0552003	-0.150739	0.0927581	0.0493422	0.0594388	0.0333991	0.0849552	0.0689572	0.145985	0.0931209	0.0276646	-0.0369837	0.0267537
A	-1.31264	-2.16761	-0.411449	-0.454749	-0.450189	-0.959328	0.774398	-0.0216399	-0.337889	-0.507515	-0.848635	0.0762161	0.0487032	-0.0323743	-0.231876	0.347672	-0.505773	-0.249859	-0.0150595	-0.586949	0.615159	0.780234	0.717232	0.107855	0.58923	-0.297146	-0.0588773	0.057753	-0.62877	0.0568673	0.0473538	0.0944826	-0.104048	0.267417	0.240678	0.443381	0.0642248	-0.386848	0.107446	-0.0533893	0.0221764	0.0625242	0.256843	0.031464	0.204393	0.0388192	-0.134652	-0.184642	-0.0161185
G	-1.34907	-2.65433	-0.0679815	-0.328406	-0.292419	-0.938442	1.07936	-0.299092	-0.282858	-0.281722	-0.827315	0.0845922	0.0625219	0.0111488	-0.218961	0.318555	-0.225787	-0.119387	0.12261	-0.71755	0.7071	0.863125	0.743574	0.196241	0.594902	-0.639189	-0.00937866	0.434526	-0.7166	0.0856396	0.081432	0.119199	-0.0920532	0.424232	0.455311	0.225794	-0.0836645	-0.5429	0.220831	0.146525	0.140998	0.0804135	0.317512	0.257835	0.289526	0.11601	0.0404356	0.152457	0.0427206
G	0.0952152	-0.666282	0.232463	0.158962	0.180669	0.000205635	0.375815	0.310025	0.257829	-0.0513247	-0.178258	0.104164	0.0277976	0.0105167	0.0686785	0.171132	0.753556	0.637997	0.766909	0.219128	0.778103	0.954003	0.893254	0.714707	0.241135	-0.0246993	0.497195	0.457631	-0.262925	0.178173	0.201682	0.224599	0.181665	0.264014	0.638701	0.484523	0.270205	0.0099465	0.333723	0.304961	0.267039	0.329871	0.195699	0.748538	0.829972	0.391941	0.454532	0.530959	0.3297
A	0.82238	0.61507	0.503587	0.523218	0.515656	0.595982	0.134075	0.566061	0.750014	0.517973	0.54515	0.324572	0.360233	0.292157	0.479451	0.16319	1.44688	1.2864	1.27548	1.35057	1.0863	1.15624	1.20422	1.25801	0.121165	0.904978	1.21504	0.744448	0.471168	0.42671	0.543063	0.485842	0.684464	0.290146	1.01547	1.03115	0.757726	0.738241	0.531846	0.527338	0.509281	0.73015	0.224378	1.30001	1.33529	0.81998	0.87939	0.856025	0.729442
A	0.89398	0.709487	0.612186	0.666604	0.650006	0.706453	0.110494	0.902867	1.10684	0.780174	0.83231	0.415879	0.479731	0.386235	0.700576	0.276374	1.39608	1.17768	1.32447	1.35477	1.14099	1.1612	1.19351	1.24981	0.104921	1.0307	1.29212	0.800751	0.649967	0.501261	0.652072	0.595821	0.788956	0.279844	1.07235	1.09047	0.893912	0.870054	0.599034	0.603488	0.591253	0.817223	0.220898	1.45361	1.4362	0.895086	0.938921	0.884706	0.791943
A	1.25912	0.976926	0.872582	0.934456	0.967494	1.00212	0.149369	1.40246	1.44386	1.60885	1.45998	0.731441	0.887697	0.666376	1.17152	0.393989	1.19876	0.987775	1.02665	0.860961	0.955038	1.09817	1.06723	1.0278	0.108374	1.68978	1.37107	1.20902	0.997577	0.627308	0.855003	0.758755	1.07265	0.373802	1.81983	1.17838	1.23624	1.2627	0.796289	0.859469	0.791236	1.13488	0.366571	1.02103	1.03925	0.664269	0.7287	0.684708	0.586594
A	0.340626	0.0916479	0.287507	0.308598	0.272621	0.2602	0.0976223	0.267224	0.206661	0.243698	0.188345	0.143148	0.163161	0.115667	0.189701	0.0541102	0.886112	0.909368	0.567368	0.441783	0.520985	0.633857	0.580039	0.648502	0.180272	0.64708	0.765596	0.54921	0.470357	0.372711	0.463834	0.441779	0.530081	0.135426	0.544004	0.522998	0.469777	0.444324	0.319731	0.331725	0.29791	0.418638	0.101484	0.618842	0.654546	0.448014	0.467888	0.463605	0.387
C	0.121602	-0.139847	0.143653	0.149101	0.127646	0.080431	0.123652	-0.0722195	-0.083708	0.00538735	-0.0983329	0.0299268	0.0109109	-0.00853235	-0.0309382	0.0521349	0.226432	0.271694	0.297737	0.077766	0.303217	0.358198	0.29864	0.261955	0.0902531	0.756741	0.738112	0.607947	0.470389	0.420216	0.593458	0.531007	0.588267	0.126929	0.163977	0.273056	0.263126	0.203981	0.0934499	0.0470213	0.03862	0.154747	0.0975534	0.226397	0.300887	0.255505	0.267832	0.248395	0.208021
T	0.234493	-0.127524	0.171763	0.168395	0.166152	0.122656	0.142735	-0.136069	-0.166822	0.00638941	-0.179051	-0.00821583	-0.0400576	-0.0517841	-0.0822301	0.0768828	0.541871	0.718625	0.450029	0.171857	0.445904	0.552447	0.474066	0.479257	0.164855	1.63225	1.10971	1.70554	3.88592	1.36007	1.32738	1.29957	1.76006	0.959234	0.152151	0.403688	0.402902	0.315215	0.29098	0.30659	0.290074	0.3088	0.0847664	0.440557	0.529375	0.378735	0.343073	0.34675	0.289611
T	0.361936	0.0660323	0.196281	0.169421	0.191525	0.197039	0.10624	-0.0525992	-0.0576093	0.0507663	-0.111933	0.0204333	-0.0219067	0.0112527	-0.0230851	0.0555056	0.63933	0.867906	0.540755	0.37271	0.562355	0.767734	0.652706	0.629071	0.160678	0.185777	0.475276	0.465379	0.368533	0.324959	0.416179	0.316597	0.364671	0.100776	0.0667679	0.197824	0.211809	0.122667	0.221046	0.181363	0.185233	0.16953	0.0553546	0.636548	0.596132	0.462612	0.464531	0.334685	0.370426
C	-0.210061	-0.923225	0.126332	0.109428	0.0881309	-0.161879	0.447534	-0.202343	-0.310826	-0.555015	-0.676309	0.00601762	-0.0328903	-0.0769215	-0.264041	0.265205	0.392118	0.39842	0.274548	-0.144202	0.482341	0.665597	0.480488	0.364187	0.253897	-0.508286	-0.124644	0.0726322	-0.40368	0.0991702	0.112657	0.1081	-0.0920072	0.263653	-0.0417496	-0.00963592	0.194325	0.0784699	0.139906	0.143472	0.135149	0.0914195	0.0872507	0.32298	0.406941	0.272203	0.300043	0.278338	0.196206
G	0.278514	-0.00722026	0.228956	0.228934	0.213529	0.188543	0.112146	0.10897	0.178518	0.0106193	-0.0966191	0.0695844	0.0295273	0.000281578	0.0429832	0.0875333	0.781853	0.850921	0.530557	0.295773	0.566862	0.736871	0.62503	0.626838	0.186559	-0.0707161	0.0151535	0.0531846	-0.277891	0.0580397	0.0548749	0.0726076	-0.0135353	0.126261	0.355675	0.420876	0.279859	0.125183	0.229015	0.190035	0.188824	0.255638	0.103596	0.613948	0.628996	0.463397	0.496771	0.486652	0.424532
G	0.764105	0.690715	0.427991	0.419746	0.460007	0.552513	0.162451	0.529066	0.790091	0.577193	0.546549	0.28248	0.289094	0.250932	0.466486	0.199621	1.22136	1.17929	0.926598	0.866552	0.889204	1.05817	1.03696	1.02545	0.139544	-0.0546656	0.135287	0.154807	-0.203802	0.12556	0.109126	0.149211	0.0593604	0.136665	1.87095	1.29557	1.32445	1.32382	0.908547	0.856246	0.885658	1.20932	0.363191	1.20915	1.18158	0.784948	0.899452	0.846679	0.90222
A	0.633694	0.550478	0.424225	0.415839	0.446355	0.494118	0.0948046	0.436674	0.624132	0.386963	0.352273	0.197149	0.214017	0.184079	0.342184	0.159681	1.33594	1.13454	1.0863	1.04588	1.01778	1.10155	1.13346	1.12221	0.103608	0.155872	0.37727	0.254062	-0.0178628	0.184139	0.186848	0.220899	0.194461	0.118607	1.83698	1.23938	1.18144	1.16397	0.79934	0.820395	0.827721	1.12418	0.367857	1.06982	1.07917	0.666629	0.774784	0.722615	0.700522
G	0.28469	0.0953359	0.183347	0.209995	0.182729	0.191219	0.0678545	0.12526	0.159196	0.122044	0.0431102	0.0267983	0.0186275	0.00680161	0.071691	0.0618071	0.5454	0.520649	0.493823	0.304703	0.449181	0.542818	0.48892	0.477928	0.0834615	0.0359226	0.212434	0.157302	-0.132546	0.160365	0.179384	0.178771	0.11309	0.121833	0.218371	0.179934	0.273376	0.190399	0.25077	0.237923	0.223968	0.224963	0.0327733	0.340989	0.449354	0.29637	0.297378	0.320504	0.214653
C	0.169233	0.0552539	0.10837	0.100743	0.0900901	0.104738	0.0413884	0.0731066	0.0920948	0.0811688	0.00455793	0.0277579	0.00348121	-0.00302455	0.0398775	0.0410192	0.169478	0.124801	0.177021	-0.00884215	0.209691	0.25142	0.160927	0.154928	0.0824355	0.0278432	0.112172	0.0809553	-0.138271	0.126957	0.124984	0.13772	0.06748	0.0982018	-0.0407634	-0.0233247	0.114318	0.0232649	0.123403	0.120025	0.111541	0.0612092	0.0726468	0.259464	0.279082	0.192018	0.188081	0.18245	0.123679
G	0.23921	0.100255	0.147688	0.136344	0.148501	0.1544	0.0513088	0.0418045	0.0702983	0.0641444	-0.0338122	0.0307148	0.00108463	-0.0170522	0.0224546	0.0401105	0.252232	0.27999	0.279903	0.0812515	0.30415	0.333315	0.314662	0.263644	0.0846823	0.0693058	0.190861	0.143416	-0.0705135	0.134548	0.14299	0.144126	0.107819	0.0863313	-0.179207	0.0547863	0.126256	0.0383527	0.180059	0.154786	0.169957	0.0778558	0.126071	0.316003	0.374906	0.266134	0.270542	0.254199	0.203966
G	0.467772	0.320308	0.219333	0.234435	0.236317	0.295633	0.104075	0.107477	0.171034	0.103985	0.0472167	0.0977264	0.0559484	0.0357529	0.0884486	0.0466244	0.857822	0.949772	0.60663	0.524135	0.548787	0.662277	0.630294	0.682817	0.160219	0.172939	0.473422	0.372375	0.205405	0.169439	0.188954	0.201987	0.254932	0.119144	-0.0384615	0.0528961	0.0744236	-0.0722405	0.294198	0.280391	0.276718	0.123989	0.157674	0.735057	0.802204	0.454934	0.5119	0.462458	0.408117
T	0.352631	0.230889	0.168984	0.185358	0.173752	0.222323	0.0768505	0.101476	0.142073	0.0427656	-0.026022	0.0928316	0.0711285	0.0499315	0.0677406	0.0532865	0.603284	0.558383	0.603909	0.511828	0.465893	0.554159	0.500821	0.542611	0.0522821	0.243859	0.474523	0.355191	0.20664	0.203849	0.225045	0.229739	0.276978	0.101211	0.0538686	0.096199	0.155312	0.0496389	0.22662	0.21396	0.212624	0.144032	0.0773199	0.69578	0.728534	0.434129	0.469993	0.425733	0.339422
C	0.190792	0.0464742	0.0680234	0.0742975	0.0665022	0.0892178	0.0577324	0.0753531	0.13432	-0.0542921	-0.113227	0.134593	0.115729	0.079168	0.053092	0.0979224	0.0624071	0.0777545	0.145989	0.0360026	0.153389	0.193536	0.15017	0.117035	0.0580282	-0.0390593	0.171365	0.176614	-0.0334824	0.112716	0.127721	0.128242	0.0920166	0.0907371	0.200181	0.128137	0.128719	0.00901297	0.1681	0.145585	0.147686	0.132489	0.0599059	0.166185	0.233253	0.130815	0.125098	0.128389	0.12003
C	0.294262	0.255871	0.14439	0.14997	0.135205	0.19594	0.0736857	0.263765	0.349376	0.261181	0.272601	0.198549	0.200292	0.171138	0.245272	0.0603898	0.0682377	0.0775798	0.133638	0.0745352	0.123775	0.144232	0.125195	0.106742	0.0319631	0.204309	0.266836	0.238963	0.18986	0.171783	0.182364	0.190102	0.206317	0.0342356	0.232263	0.218337	0.22658	0.196383	0.172777	0.160851	0.160746	0.19542	0.0309959	0.126719	0.162358	0.150481	0.143216	0.145442	0.110241
C	0.287878	0.199189	-0.0743945	-0.0722353	-0.129385	0.0422104	0.187839	0.40388	0.498375	0.404749	0.398831	0.226917	0.239051	0.205639	0.339635	0.113906	0.0901639	0.107107	0.134625	0.0268768	0.1098	0.127026	0.0449262	0.0915035	0.0409214	0.337476	0.431587	0.407377	0.38459	0.148599	0.256177	0.218589	0.312057	0.106347	0.296946	0.248122	0.259342	0.161864	0.160735	0.135205	0.125494	0.198244	0.0682638	0.0943414	0.199364	0.158405	0.163017	0.153436	0.118134
A	0.902347	0.82665	0.459701	0.467693	0.451834	0.621645	0.223374	1.16372	1.34222	0.791677	0.799687	0.464884	0.477567	0.38093	0.774383	0.368251	0.247835	0.225384	0.263576	0.103336	0.288794	0.313831	0.260087	0.243263	0.0679075	0.59567	0.975255	0.620716	0.421861	0.319881	0.442703	0.391644	0.538247	0.220954	0.678913	0.627892	0.541927	0.488114	0.44594	0.410856	0.40633	0.514281	0.106834	0.366533	0.522368	0.302184	0.225491	0.259208	0.210764
G	0.966923	0.95331	0.460637	0.472646	0.475136	0.66573	0.268836	0.995903	1.24478	0.801328	0.777241	0.440799	0.455501	0.344034	0.722799	0.329297	0.494896	0.46781	0.431022	0.376499	0.422364	0.488109	0.418974	0.44281	0.0426463	0.710317	0.874587	0.558974	0.377271	0.385138	0.501875	0.458951	0.552445	0.181988	0.633234	0.70413	0.60744	0.518373	0.459456	0.422272	0.41288	0.536827	0.113346	0.570448	0.593705	0.440828	0.420056	0.42693	0.330536
C	0.681952	0.644817	0.251816	0.270091	0.269189	0.423573	0.219431	0.679574	0.948377	0.588077	0.583245	0.378156	0.383272	0.309279	0.552854	0.221083	0.547808	0.463838	0.439539	0.404908	0.395891	0.442555	0.367945	0.437498	0.0584847	0.499904	0.553103	0.443986	0.293151	0.167243	0.23125	0.226116	0.344965	0.151909	0.787542	0.855386	0.479344	0.384326	0.430089	0.399661	0.390923	0.532467	0.20094	0.551189	0.52084	0.388679	0.399073	0.404035	0.336526
C	0.417531	0.322331	-0.185745	-0.203423	-0.232169	0.0237053	0.318278			0.391528	0.390626	0.295831	0.289751	0.226572	0.318862	0.0712843			0.330924	0.260084	0.253262	0.275054	0.126247	0.249114	0.075166			0.441564	0.428727	0.182265	0.215488	0.254801	0.304569	0.122018			0.211891	0.136714	0.186369	0.170305	0.142353	0.169526	0.0312015			0.319734	0.329422	0.313609	0.238728
A	0.850201	0.864692	0.472496	0.45835	0.525964	0.634341	0.205286			0.785472	0.868232	0.507738	0.522928	0.396625	0.616199	0.20053			0.677756	0.703733	0.568828	0.631146	0.564692	0.629231	0.062695			0.704173	0.688649	0.392004	0.554871	0.487303	0.5654	0.13297			0.648927	0.603343	0.462231	0.464499	0.445355	0.524871	0.0941266			0.530558	0.512433	0.551176	0.48172
A	1.27992	1.36944	0.718414	0.679321	0.856345	0.980688	0.322388			1.37451	1.2863	0.752029	0.781355	0.568694	0.952578	0.355775			0.998678	1.05145	0.945909	1.03507	1.02716	1.01165	0.0414221			1.19253	1.15014	0.567302	0.884709	0.719537	0.902842	0.269995			1.00958	0.885742	0.665258	0.667794	0.658319	0.777339	0.161567			0.795395	0.775237	0.758836	0.713345
T	0.882584	0.774041	0.466706	0.47191	0.500354	0.619119	0.195205			0.706767	0.734988	0.452318	0.494251	0.329723	0.543609	0.173035			0.662564	0.602726	0.629678	0.74151	0.667811	0.660858	0.0522196			0.776996	0.576535	0.429247	0.586057	0.475639	0.568895	0.134031			0.563716	0.526185	0.430241	0.402938	0.404592	0.465534	0.0744916			0.529397	0.537645	0.485927	0.439694
G	0.641579	0.615266	0.29281	0.300553	0.306805	0.431402	0.180162			0.33174	0.238649	0.178944	0.195812	0.121024	0.213234	0.078536			0.347932	0.204082	0.347206	0.389778	0.331702	0.32414	0.070494			0.411158	0.231192	0.225771	0.28837	0.264278	0.284154	0.0754261			0.258	0.205023	0.280374	0.261808	0.251697	0.25138	0.0280279			0.332079	0.287967	0.285944	0.241411
G	0.45585	0.370874	0.242852	0.238854	0.256038	0.312894	0.0967192			0.299284	0.214158	0.166189	0.192737	0.109386	0.196351	0.0696385			0.328723	0.216747	0.335	0.360621	0.294426	0.307103	0.0557558			0.393711	0.152071	0.204251	0.280426	0.23465	0.253022	0.0914488			0.255573	0.179512	0.227808	0.208503	0.194386	0.213157	0.0296639			0.333678	0.273955	0.269302	0.204805
A	0.626719	0.661504	0.351966	0.365479	0.384208	0.477975	0.152589			0.522047	0.531524	0.346949	0.36446	0.275195	0.408035	0.113496			0.539133	0.587484	0.425931	0.455919	0.430109	0.487715	0.0720147			0.533632	0.583355	0.340473	0.441077	0.376948	0.455097	0.102543			0.375207	0.394651	0.297705	0.301288	0.287765	0.331323	0.0496635			0.477203	0.466574	0.452568	0.395352
A	0.933545	0.945706	0.569457	0.536904	0.556975	0.708517	0.211335			0.86593	0.880404	0.533023	0.555519	0.384889	0.643953	0.21933			0.797792	0.89656	0.617405	0.677713	0.654349	0.728764	0.115612			0.839513	0.868164	0.503812	0.703887	0.590962	0.701268	0.156628			0.621247	0.618602	0.442425	0.387978	0.414341	0.496919	0.113931			0.67666	0.698312	0.618714	0.580672
G	1.67249	1.96485	1.04674	0.88033	1.04705	1.32229	0.469718			1.56996	1.72346	1.05755	1.03872	0.763032	1.23055	0.40108			1.1129	1.52228	1.10613	1.14076	1.15836	1.20808	0.176901			1.52201	1.74749	0.864458	1.28166	1.0145	1.28602	0.360589			1.17882	1.31753	0.810084	0.784028	0.751036	0.968301	0.260996			1.06094	1.02079	1.0241	1.01322
A	1.06048	1.25462	0.602213	0.583184	0.616458	0.823392	0.312896			0.888274	1.00507	0.609621	0.625861	0.464562	0.718679	0.221286			0.720396	0.933606	0.657759	0.688592	0.665301	0.733131	0.114693			0.834521	1.00792	0.55636	0.715711	0.60291	0.743485	0.182868			0.660216	0.779829	0.465293	0.474546	0.453672	0.566711	0.14639			0.682202	0.632246	0.663555	0.605494
C	0.333985	0.294732	0.281309	0.310028	0.298542	0.303719	0.0197837			0.148095	-0.0426217	0.225439	0.267008	0.17737	0.155058	0.119488			0.33086	0.411377	0.343638	0.400634	0.343996	0.366101	0.0370056			0.448546	0.373935	0.190178	0.297527	0.24345	0.310727	0.10274			0.205872	0.30097	0.209206	0.200367	0.181231	0.219529	0.0467964			0.28312	0.254174	0.219636	0.175046
G	0.68555					0.68555	#DIV/0!			0.424295					0.424295	#DIV/0!			0.495108					0.495108	#DIV/0!			0.707785					0.707785	#DIV/0!			0.493943					0.493943	#DIV/0!			0.551097	0.519177	0.4825
C	0.158138					0.158138	#DIV/0!			0.504113					0.504113	#DIV/0!			0.283081					0.283081	#DIV/0!			0.397443					0.397443	#DIV/0!			-0.0564119					-0.0564119	#DIV/0!			0.312647	0.221092	0.237423
[truncated: 24 more columns]

## Sheet: WT no miR122
5' SLVI							3'SLVI
Sequence	1a	1b	2a	Avg	SD		Sequence	1a	1b	2a	2b	Avg	SD
G	1.09197	0.57831	0.223867	0.631383	0.436479		A	0.401061	0.100592	0.370433	0.242971	0.278764	0.137096
A	0.443332	0.462239	0.187263	0.364278	0.153591		A	0.344944	-0.0169568	0.241614	0.198246	0.191962	0.152267
U	0.356324	0.263566	0.152263	0.257384	0.102171		G	0.383752	0.127886	0.238213	0.302907	0.26319	0.10808
C	0.289417	0.203768	-0.455288	0.0126327	0.407487		G	0.675484	0.526669	0.505557	0.647095	0.588701	0.0850528
G	0.480229	0.634325	0.404261	0.506272	0.117222		A	1.09445	1.09232	1.21618	1.03022	1.10829	0.0778499
U	0.651412	0.430562	0.375562	0.485845	0.145998		A	1.04702	1.02569	1.03782	1.03609	1.03666	0.00874415
U	0.142356	0.268229	0.219872	0.210152	0.0634971		A	0.873196	0.836966	0.770438	0.992645	0.868311	0.0931745
G	0.154397	0.0651514	0.0300334	0.0831938	0.0641149		A	1.03848	1.11544	1.1696	0.840897	1.0411	0.143905
G	0.234572	0.0598679	0.205986	0.166809	0.0937097		C	0.896806	0.781275	0.897563	0.664147	0.809948	0.111506
C	-0.0690313	-0.0291776	0.00107564	-0.0323778	0.0351628		U	0.947133	0.881993	0.788094	0.977137	0.898589	0.0836877
G	-0.343524	-0.0105742	-0.0371851	-0.130428	0.185026		U	1.01438	1.20091	1.06462	1.04689	1.0817	0.082152
G	-0.193468	-0.275322	-1.2913	-0.586698	0.611577		C	0.683948	0.582012	0.532434	0.744887	0.63582	0.0962564
A	-0.163559	-0.358989	-0.413823	-0.312124	0.13155		G	0.705404	0.582176	0.569547	0.560908	0.604509	0.067828
G	-0.115558	-0.482488	0.465966	-0.0440269	0.478256		G	0.713617	0.629661	0.556968	0.490126	0.597593	0.0960721
U	0.537627	0.312423	0.49498	0.448344	0.119626		A	0.674423	0.750215	0.579922	0.530145	0.633676	0.0980644
A	0.949854	1.11361	1.81461	1.29269	0.459351		G	0.610576	0.642365	0.453491	0.450176	0.539152	0.101667
U	0.858976	1.19384	1.24481	1.09921	0.209602		C	0.444382	0.655573	0.432005	0.390752	0.480678	0.118829
A	0.784782	0.750563	0.595928	0.710424	0.100622		G	0.419791	0.379697	0.376307	0.308669	0.371116	0.0460773
C	0.0328514	-0.0821624	-0.115717	-0.0550093	0.0779173		G	0.537125	0.411524	0.481054	0.29813	0.431958	0.102953
U	0.0138604	-0.0308286	-0.116049	-0.044339	0.066		U	0.477887	0.267608	0.405911	0.241344	0.348188	0.112639
U	-0.0118357	-0.000951554	-0.174261	-0.0623494	0.0970709		C	0.450376	-0.0899935	0.299522	0.193672	0.213394	0.228043

## Sheet: + J22
5' SLVI			3'SLVI
Sequence	Reactivity		Sequence	Reactivity
G	0.369366		A	0.138516
A	0.364335		A	0.00783963
U	0.297522		G	0.142997
C	0.207698		G	0.329031
G	0.262412		A	0.542875
U	0.247971		A	0.728959
U	0.290751		A	1.33185
G	0.296668		A	0.377728
G	1.69039		C	0.2158
C	0.151863		U	0.311417
G	0.152458		U	0.265739
G	0.175764		C	0.217351
A	0.160699		G	0.261228
G	0.204601		G	0.441213
U	0.195872		A	0.279288
A	0.407272		G	0.164384
U	0.443109		C	0.13624
A	0.347614		G	0.112575
C			G	0.0888685
U			U	-0.0476281
U			C	0.0163537
